# Supplementary material
Source: PubMed Central journal article supplement (PMC6509662)
Supplement: JB.00098-19-s0001.pdf [file JB.00098-19-s0001.pdf]

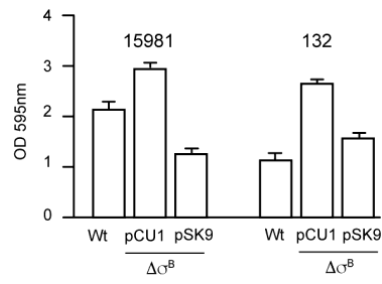

**Figure S1:** Biofilm formation capacity of *S. aureus* 15981 and 132 and their respective  $\sigma^B$  mutants complemented with pSK9 ( $\sigma^B$ ) or pCU1 (empty plasmid) on polystyrene microtitre plates after 8 h.

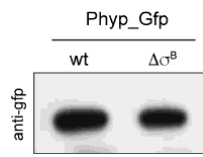

**Figure S2:** The Phyper promoter shows a constitutive activity that does not depend on  $\sigma^B$ . The *gfpmut2* gene was cloned under the phyper promoter leading to plasmid pCN52-Phyp\_gfp. pCN52-Phyp\_gfp plasmid was introduced in *S. aureus* 15981 wild-type and  $\Delta\sigma$  mutant strains and an immunoblot of the Gfp protein was carried out.

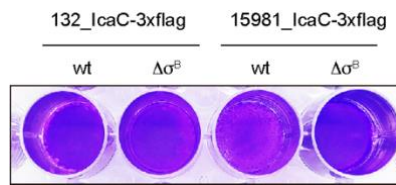

**Figure S3:** Biofilm formation of IcaC-tagged *S. aureus* 15981 and 132 strains and their respective  $\sigma^B$  mutants. Bacteria were grown on polystyrene microtitre plates for 24h. After washing, bacterial cells adhered to the polystyrene wells were stained with crystal violet and biofilms
